# Supplementary material for: Scrutinizing Punishment Institutions: A Lab Experiment on Alternative Punishment Regimes
Source: publisher site journal article supplement (doi:10.1515/rle-2024-0055), 2025-11-01
Supplement: Supplementary file 1 [file j_rle-2024-0055_suppl_001.docx]

**ONLINE APPENDIX**

1. **Figures and Tables**

**Table A1. Probit Regression (R1) – Marginal effects**

**Dependent variable: C**-player**’s decision to punish A**-player

Cluster at session level

N = 173

Log pseudolikelihood = -93.291901

Prob > chi2 = 0.0000

Pseudo R2 = 0.0781

|  | dy/dx | Std. Err. | P>|z| |
| --- | --- | --- | --- |
| GIVING REASONS | 0.1115 | 0.0524 | **0.033** |
| VERTICAL CONTROL | 0.1129 | 0.0582 | **0.052** |
| VERTICAL CONTROL* GIVING REASONS | -0.1299 | 0.0770 | **0.092** |
| FIRST | 0.0130 | 0.0990 | 0.895 |
| NON_BELIEVER | 0.0835 | 0.0851 | 0.327 |
| VOLUNTEER | 0.1335 | 0.1091 | 0.221 |
| JOB | -0.0992 | 0.0631 | 0.116 |
| AGE | 0.0115 | 0.0223 | 0.606 |
| MALE | -0.0960 | 0.0978 | 0.327 |
| TROLLEY | -0.2338 | 0.0835 | **0.005** |

**Table A2. Probit Regression (R2) – Marginal effects**

**Dependent variable: Final decision to punish A-player**

Cluster at group level

N = 173

Log pseudolikelihood = -102.61779

Prob > chi2 = 0.0218

Pseudo R2 = 0.0700

|  | dy/dx | Std. Err. | P>|z| |
| --- | --- | --- | --- |
| GIVING REASONS | 0.1043 | 0.0995 | 0.294 |
| VERTICAL CONTROL | 0.2967 | 0.0986 | **0.003** |
| VERTICAL CONTROL* GIVING REASONS | -0.2330 | 0.1135 | **0.040** |
| FIRST | 0.0874 | 0.0847 | 0.302 |
| JOB | -0.0543 | 0.0925 | 0.557 |
| AGE | 0.0259 | 0.0198 | 0.189 |
| MALE | -0.0783 | 0.0833 | 0.347 |
| TROLLEY | -0.2009 | 0.0951 | **0.035** |

**Table A3. Ordered Probit Regression (R3) – Marginal effects**

**Dependent variable: Final level of punishment (FLP)**

Cluster at group level

N = 173

Log pseudolikelihood = -141.90076

Prob > chi2 = 0.0459

Pseudo R2 = 0.0520

## Marginal effects – FLP = 0

|  | dy/dx | Std. Err. | P>|z| |
| --- | --- | --- | --- |
| GIVING REASONS | -0.1025 | 0.0884 | 0.246 |
| VERTICAL CONTROL | -0.2875 | 0.0939 | **0.002** |
| VERTICAL CONTROL* GIVING REASONS | 0.2459 | 0.1355 | **0.070** |
| FIRST | 0.0015 | 0.0597 | 0.979 |
| AGE | -0.0280 | 0.0178 | 0.116 |
| MALE | 0.0269 | 0.0786 | 0.732 |
| TROLLEY | 0.2047 | 0.0747 | **0.006** |

## 2. Marginal effects – FLP = 100

|  | dy/dx | Std. Err. | P>|z| |
| --- | --- | --- | --- |
| GIVING REASONS | 0.0245 | 0.0215 | 0.255 |
| VERTICAL CONTROL | 0.0687 | 0.0231 | **0.003** |
| VERTICAL CONTROL* GIVING REASONS | -0.0588 | 0.0341 | **0.085** |
| FIRST | -0.0004 | 0.0143 | 0.979 |
| AGE | 0.0067 | 0.0039 | **0.089** |
| MALE | -0.0064 | 0.0192 | 0.737 |
| TROLLEY | -0.0489 | 0.0196 | **0.013** |

## 3. Marginal effects – FLP = 150

|  | dy/dx | Std. Err. | P>|z| |
| --- | --- | --- | --- |
| GIVING REASONS | 0.0779 | 0.0680 | 0.252 |
| VERTICAL CONTROL | 0.2187 | 0.0789 | **0.006** |
| VERTICAL CONTROL* GIVING REASONS | -0.1871 | 0.1057 | **0.077** |
| FIRST | -0.0012 | 0.0454 | 0.979 |
| AGE | 0.0213 | 0.0143 | 0.136 |
| MALE | -0.0205 | 0.0595 | 0.731 |
| TROLLEY | -0.1558 | 0.0603 | **0.010** |

**FIGURE A1. C-players’ level of punishment in case of theft across the treatments**

1. **Categories of reasons provided by C-players in the GRT and in the VGRT**

Analyzing the motivations provided by C-players in the GRT and VGRT, we can identify the following types of individuals:

- **Homo Oeconomicus (HO):** the classic rational, selfish, and self-interested agent.
- **Advanced Homo Oeconomicus (HO2):** C-player includes D-player's interests in his/her reasoning. In other words, C-player tries to convince D that it is beneficial for both not to sanction, so no tokens are lost (this category exists only in the VGRT).
- **Fairness-driven (F):** an individual motivated by concerns of fairness and justice.
- **Altruist (A):** an individual whose primary concern is the well-being of others, regardless of their behavior.
- **Random (RA):** an individual who makes choices randomly.
- **Needs Information (INFO):** an individual who feels he/she lacks sufficient information to make a decision.

The most relevant types for our analysis are undoubtedly the first four. If we examine the distribution of these categories across the two treatments, we observe that there is no significant difference.

**Table B1. Distribution of C-players categories – based on the nature of their reasons to punish or not - in the GRT and in the VGRT**

| **Category** | **GRT (N=42)** | **VGRT (N=44)** |
| --- | --- | --- |
| A (Altruist) | 2.4% | 6.8% |
| F (Fairness-driven) | 28.6% | 22.7% |
| **OTHER ORIENTED (A+F)** | **31%** | **29.5%** |
|  |  |  |
| HO (Homo Oeconomicus) | 54.8% | 36.4% |
| HO2 (Advanced Homo Oeconomicus) | - | 15.9% |
| **SELF ORIENTED (HO+HO2)** | **54.8%** | **52.3%** |
|  |  |  |
| **OTHER** | **14.2%** | **18.2%** |
|  |  |  |
| **TOTAL** | **100%** | **100%** |
| **Chi2 = 0.2393 p = 0.887** |  |  |

When analyzing the distribution of categories based on the decision to sanction or not, we see that in both treatments, the majority of C-players who impose sanctions do so driven by fairness concerns (92% and 77%, respectively). On the other hand, those who choose not to sanction do so primarily for self-interested reasons (79% and 71%, respectively).

#### **Tables B2-B5. Relation between C-players’ decision to punish or not and their category**

#### **GRT VGRT**

| **Punish \ FAIR** | **FAIR = 0** | **FAIR = 1** |
| --- | --- | --- |
| **0 (N=29)** | 100.00% | 0.00% |
| **1 (N=13)** | 7.69% | **92.31%** |
| **Total (N = 42)** | 71.43% | 28.57% |
| **Chi2 = 37.4769**  **p = 0.000** |  |  |

| **Punish \ FAIR** | **FAIR = 0** | **FAIR = 1** |
| --- | --- | --- |
| **0 (N=31)** | 100.00% | 0.00% |
| **1 (N=13)** | 23.08% | **76.92%** |
| **Total (N=44)** | 77.27% | 22.73% |
| **Chi2 = 30.8597**  **p = 0.000** |  |  |

#### **GRT VGRT**

| **Punish \ SELF** | **SELF = 0** | **SELF = 1** |
| --- | --- | --- |
| **0 (N=29)** | 20.69% | **79.31%** |
| **1 (N=13)** | 100.00% | 0.00% |
| **Total (N = 42)** | 45.24% | 54.76% |
| **Chi2 = 22.7913**  **p = 0.000** |  |  |

| **Punish \ SELF** | **SELF = 0** | **SELF = 1** |
| --- | --- | --- |
| **0 (N=31)** | 29.03% | **70.97%** |
| **1 (N=13)** | 92.31% | 7.69% |
| **Total (N=44)** | 47.73% | 52.27% |
| **Chi2 = 14.6988**  **p = 0.000** |  |  |

If we consider the number of words the C-players wrote, we find that on average they use 15 words in both treatments
