# Supplementary material for: Scrutinizing Punishment Institutions: A Lab Experiment on Alternative Punishment Regimes
Source: publisher site journal article supplement (doi:10.1515/rle-2024-0055), 2025-11-01
Supplement: Supplementary file 2 [file j_rle-2024-0055_suppl_002.docx]

**INSTRUCTIONS**

TRIAL

Good morning. Thank you for participating in the experiment. There won’t be specific

difficulties or trick questions. You will have to carefully follow the instructions that will appear

sequentially on your screen. The answers that you will provide will be completely anonymous: for

those who will analyse the data, it won’t be possible to trace it back to you.

---

This experiment involves three types of participants (participant A, participant B, participant C) and consists of three rounds. Each round consists of two stages. At the beginning of the first round, you will be randomly assigned to one of three roles – A, B, or C – and you will also be assigned to a group. Each group is composed of a subject A, a subject B, and three subjects C.

In each round, in the first stage, each participant A has to decide whether or not to take some money

from a participant B he/she will be matched with.

In each round, in the second stage, a participant C will be randomly selected. He/she has to decide whether or not to punish the participant A he/she will be matched with if he/she decided to take some money from B. The two subjects C that are not drawn must wait.

Each subject C will be drawn only once during the experiment. This means that, since the number of rounds is equal to the number of the subjects C in each group, each subject C will certainly be selected in one round.

In summary, each subject A will make a choice in each round, whereas each subject C will make a choice only one time.

In the next screens we will explain, in detail, the characteristics of each phase.

---

In each round, in the FIRST STAGE, participant A has an endowment of 200 tokens and has to

decide whether or not to take 50 tokens from participant B. Participant B has an endowment

of 200 tokens and does not have to take any decision.

---

In each round, in the SECOND STAGE, each participant C has an endowment of 200 tokens. Subjects C that are not drawn will receive 200 tokens and will not have to do anything.

The drawn Subject C, before the computer communicates the choice made by A, must decide whether and how much to punish A if A decides to take the 50 tokens from B. In particular, C can use the 200 tokens in these ways:

1. Sanction A 100 tokens by spending 10 tokens.
2. Sanction A 150 tokens by spending 10 tokens.
3. Do not sanction A and keep the 200 tokens.

The decision made by the drawn subject C will be communicated to subject A and subject B only at the end of the experiment, after the third round has ended.

---

How are the payments calculated in each round?

If subject A does not subtract the 50 tokens from subject B, each receives the payment corresponding to the initial allocation of 200 tokens.

If the subject A takes the 50 tokens from subject B, the payments of A, B, and the drawn subject C depend, in addition to A’s choice, on the decisions taken by the drawn subject C. C subjects not drawn instead receive their allocation of 200 euros, regardless of the choices of the other subjects.

---

In particular, in each round, if subject A takes the tokens:

**The payments of subject A will be equal to**:

250 tokens if C decides not to punish him/her.

250 – 100 tokens if C decides to punish him/her by 100 tokens.

250 – 150 tokens if C decides to punish him/her by 150 tokens.

**The payments of subject B will be equal to** 150 tokens.

**The payments of the drawn subject C will be equal to**:

200 tokens if he/she decides not to punish A.

200 – 10 tokens if decides to punish A.

**The payments of the subjects C not drawn will be equal to** the endowment of 200 tokens.

The final payment is equal to the sum of the payments received in each round.

Each token is worth **0.02** Euros.

---

We now give you a summary table.

TRIAL MOTIVATION

Good morning. Thank you for participating in the experiment. There won’t be specific

difficulties or trick questions. You will have to carefully follow the instructions that will appear

sequentially on your screen. The answers that you will provide will be completely anonymous: for

those who will analyse the data, it won’t be possible to trace it back to you.

---

This experiment involves three types of participants (participant A, participant B, participant C) and consists of three rounds. Each round consists of two stages. At the beginning of the first round, you will be randomly assigned to one of three roles – A, B, or C – and you will also be assigned to a group. Each group is composed of a subject A, a subject B, and three subjects C.

In each round, in the first stage, each participant A has to decide whether or not to take some money

from a participant B he/she will be matched with.

In each round, in the second stage, a participant C will be randomly selected. He/she has to decide whether or not to punish the participant A he/she will be matched with if he/she decided to take some money from B. The two subjects C that are not drawn must wait.

Each subject C will be drawn only once during the experiment. This means that, since the number of rounds is equal to the number of the subjects C in each group, each subject C will certainly be selected in one round.

In summary, each subject A will make a choice in each round, whereas each subject C will make a choice only one time.

In the next screens we will explain, in detail, the characteristics of each phase.

---

In each round, in the FIRST STAGE, participant A has an endowment of 200 tokens and has to

decide whether or not to take 50 tokens from participant B. Participant B has an endowment

of 200 tokens and does not have to take any decision.

---

In each round, in the SECOND STAGE, each participant C has an endowment of 200 tokens. Subjects C that are not drawn will receive 200 tokens and will not have to do anything.

The drawn Subject C, before the computer communicates the choice made by A, must decide whether and how much to punish A if A decides to take the 50 tokens from B. In particular, C can use the 200 tokens in these ways:

1. Sanction A 100 tokens by spending 10 tokens.
2. Sanction A 150 tokens by spending 10 tokens.
3. Do not sanction A and keep the 200 tokens.

The drawn subject C will also be asked to briefly explain the reason for her/his choice. This reason will not be communicated to the other members of the group, but will simply be stored in the dataset.

The decision made by the drawn subject C (i.e., whether or not to punish in the event that A had taken the tokens from B) will be communicated to subject A and subject B only at the end of the experiment after the third round has ended.

---

How are the payments calculated in each round?

If subject A does not subtract the 50 tokens from subject B, each receives the payment corresponding to the initial allocation of 200 tokens.

If the subject A takes the 50 tokens from subject B, the payments of A, B, and the drawn subject C depend, in addition to A’s choice, on the decisions taken by the drawn subject C. C subjects not drawn instead receive their allocation of 200 euros, regardless of the choices of the other subjects.

---

In particular, in each round, if subject A takes the tokens:

**The payments of subject A will be equal to**:

250 tokens if C decides not to punish him/her.

250 – 100 tokens if C decides to punish him/her by 100 tokens.

250 – 150 tokens if C decides to punish him/her by 150 tokens.

**The payments of subject B will be equal to** 150 tokens.

**The payments of the drawn subject C will be equal to**:

200 tokens if he/she decides not to punish A.

200 – 10 tokens if decides to punish A.

**The payments of the subjects C not drawn will be equal to** the endowment of 200 tokens.

The final payment is equal to the sum of the payments received in each round.

Each token is worth **0.02** Euros.

---

We now give you a summary table.

APPELLATE

Good morning. Thank you for participating in the experiment. There won’t be specific

difficulties or trick questions. You will have to carefully follow the instructions that will appear

sequentially on your screen. The answers that you will provide will be completely anonymous: for

those who will analyse the data, it won’t be possible to trace it back to you.

---

This experiment involves four types of participants (A, B, C and D) and consists of three rounds. Each round consists of three stages. At the beginning of first round, you will be randomly assigned to one of three roles: A, B, C, or D and you will also be assigned to a group. Each group is composed of a subject A, a subject B, three subjects C, and a subject D.

In each round, in the first stage, each participant A has to decide whether or not to take some money

from a participant B he/she will be matched with.

In each round, in the second stage, a participant C will be randomly selected. He/she has to decide whether or not to punish the participant A he/she will be matched with if he/she decided to take some money from B. The two subjects C that are not drawn must wait. In the third stage, subject D must decide whether or not to confirm the choice of the drawn subject C.

Each subject C will be drawn only once during the experiment. This means that, since the number of rounds is equal to the number of the subjects C in each group, each subject C will certainly be selected in one round.

In summary, each subject A and each subject D will make a choice in each round, whereas each subject C will make a choice only one time.

In the next screens we will explain, in detail, the characteristics of each phase.

---

In each round, in the FIRST STAGE, participant A has an endowment of 200 tokens and has to

decide whether or not to take 50 tokens from participant B. Participant B has an endowment

of 200 tokens and does not have to take any decision.

---

In each round, in the SECOND STAGE, each participant C has an endowment of 200 tokens. Subjects C that are not drawn will receive 200 tokens and will not have to do anything.

The drawn Subject C, before the computer communicates the choice made by A, must decide whether and how much to punish A if A decides to take the 50 tokens from B. In particular, C can use the 200 tokens in these ways:

1) Sanction A 100 tokens by spending 10 tokens.

2) Sanction A 150 tokens by spending 10 tokens.

3) Do not sanction A and keep the 200 tokens.

The decision made by the drawn subject C will be communicated to subject A and subject B only at the end of the experiment after the third round has ended

---

In each round, in the THIRD STAGE, participant D has an endowment of 200 tokens. Subject D is informed of the choice that the drawn subject C made in the second stage. Subject D can confirm or modify subject C’s choice by choosing one of the two options not selected by subject C. If she/he modifies the choice of subject C, D incurs a cost of 10 tokens whereas C incurs a cost of 20 tokens.

Remember that there are three options from which C can choose: 1) sanction A 100 tokens; 2) sanction A 150 tokens; 3) do not sanction A.

---

What then happens in the third stage in each round?

If A does not subtract the 50 tokens from B, the choices of the drawn subject C and subject D are not applicable and everyone receives the initial endowment of 200 tokens.

If A takes the 50 tokens from B, the final result depends not only on A but also on the decisions made by the drawn C and D.

In particular, if subject D confirms the choice of subject C, then the option chosen by subject C in the second phase will actually be implemented.

If, instead, subject D decides to modify subject C’s choice, then the option chosen in the third phase by subject D will be implemented.

In other words, the choice of the drawn subject C is applied only if subject D confirms it. Otherwise, the choice of subject D is implemented.

---

Let’s call the implemented choice “final choice” and give some examples:

- If the drawn subject C decides to punish subject A and subject D opts instead for non-sanction, the final choice will be “not sanction A”.
- If the extracted subject C decides not to sanction subject A and subject D does not confirm the choice from C and decides to sanction A by 150 tokens, the final choice will be “sanction A by 150 tokens”.
- If the extracted subject C decides to sanction A by 150 tokens and subject D does not confirm the choice from C and decides to sanction A by 100 tokens, the final choice will be “sanction A by 100 tokens”.

The final choice made in each round will be communicated to subjects A and B only at the end of the experiment after the third round has ended.

---

How are the payments calculated in each round?

If subject A does not subtract the 50 tokens from subject B, each receives the payment corresponding to the initial endowment of 200 tokens.

If the subject A takes the 50 tokens from subject B, the payments of A and the drawn subject C and D depend, in addition to A’s choice, on the decisions taken by the drawn subject C and subject D. The payment of subject B depends only on the choice of subject A. The subjects C that are not drawn instead receive their allocation of 200 euros, regardless of the choices of the other subjects.

---

In particular, in each round, if subject A takes the tokens:

**The payments of subject A will be equal to**:

250 tokens if the final choice is not to sanction him/her.

250 – 100 tokens if the final choice is to sanction him/her by 100 tokens.

250 – 150 tokens if the final choice is to sanction him/her by 150 tokens.

**The payments of subject B will be equal to** 150 tokens

**The payments of the drawn subject C will be equal to**:

200 tokens if he/she decides not to sanction A and D confirms the choice.

200 – 20 tokens if he/she decides not to sanction A and D does not confirm the choice.

200 – 10 tokens if he/she decides to sanction A and D confirms the choice.

200 – 10 – 20 tokens if he/she decides to sanction A and D does not confirm the choice.

**The payments of subject D will be equal to**:

200 tokens if he/she confirms the choice of C.

200 – 10 tokens if he/she does not confirm the choice of C.

**The payments of the subjects C not drawn will be equal to** the endowment of 200 tokens.

The final payment is equal to the sum of the payments received in each round.

Each token is worth **0.02** euros.

---

We now give you a summary table

APPELLATE MOTIVATION

Good morning. Thank you for participating in the experiment. There won’t be specific

difficulties or trick questions. You will have to carefully follow the instructions that will appear

sequentially on your screen. The answers that you will provide will be completely anonymous: for

those who will analyse the data, it won’t be possible to trace it back to you.

---

This experiment involves four types of participants (A, B, C and D) and consists of three rounds. Each round consists of three stages. At the beginning of first round, you will be randomly assigned to one of three roles: A, B, C, or D and you will also be assigned to a group. Each group is composed of a subject A, a subject B, three subjects C, and a subject D.

In each round, in the first stage, each participant A has to decide whether or not to take some money

from a participant B he/she will be matched with.

In each round, in the second stage, a participant C will be randomly selected. He/she has to decide whether or not to punish the participant A he/she will be matched with if he/she decided to take some money from B. The two subjects C that are not drawn must wait. In the third stage, subject D must decide whether or not to confirm the choice of the drawn subject C.

Each subject C will be drawn only once during the experiment. This means that, since the number of rounds is equal to the number of the subjects C in each group, each subject C will certainly be selected in one round.

In summary, each subject A and each subject D will make a choice in each round, whereas each subject C will make a choice only one time.

In the next screens we will explain, in detail, the characteristics of each phase.

---

In each round, in the FIRST STAGE, participant A has an endowment of 200 tokens and has to

decide whether or not to take 50 tokens from participant B. Participant B has an endowment

of 200 tokens and does not have to take any decision.

---

In each round, in the SECOND STAGE, each participant C has an endowment of 200 tokens. Subjects C that are not drawn will receive 200 tokens and will not have to do anything.

The drawn Subject C, before the computer communicates the choice made by A, must decide whether and how much to punish A if A decides to take the 50 tokens from B. In particular, C can use the 200 tokens in these ways:

1) Sanction A 100 tokens by spending 10 tokens.

2) Sanction A 150 tokens by spending 10 tokens.

3) Do not sanction A and keep the 200 tokens.

The extracted subject C will also be asked to briefly explain the reason for his/her choice.

The motivation will be communicated, in the next stage, only to the matched subject D (therefore, not to the matched subjects A and B)

---

In each round, in the THIRD STAGE, participant D has an endowment of 200 tokens. Subject D is informed of the choice that the drawn subject C made in the second stage. Subject D can confirm or modify subject C’s choice by choosing one of the two options not selected by subject C. If she/he modifies the choice of subject C, D incurs a cost of 10 tokens whereas C incurs a cost of 20 tokens.

Remember that there are three options from which C can choose: 1) sanction A 100 tokens; 2) sanction A 150 tokens; 3) do not sanction A.

---

What then happens in the third stage in each round?

If A does not subtract the 50 tokens from B, the choices of the drawn subject C and subject D are not applicable and everyone receives the initial endowment of 200 tokens.

If A takes the 50 tokens from B, the final result depends not only on A but also on the decisions made by the drawn C and D.

In particular, if subject D confirms the choice of subject C, then the option chosen by subject C in the second phase will actually be implemented.

If, instead, subject D decides to modify subject C’s choice, then the option chosen in the third phase by subject D will be implemented.

In other words, the choice of the drawn subject C is applied only if subject D confirms it. Otherwise, the choice of subject D is implemented.

---

Let’s call the implemented choice “final choice” and give some examples:

- If the drawn subject C decides to punish subject A and subject D opts instead for non-sanction, the final choice will be “not sanction A”.
- If the extracted subject C decides not to sanction subject A and subject D does not confirm the choice from C and decides to sanction A by 150 tokens, the final choice will be “sanction A by 150 tokens”.
- If the extracted subject C decides to sanction A by 150 tokens and subject D does not confirm the choice from C and decides to sanction A by 100 tokens, the final choice will be “sanction A by 100 tokens”.

The final choice made in each round will be communicated to subjects A and B only at the end of the experiment after the third round has ended

---

How are the payments calculated in each round?

If subject A does not subtract the 50 tokens from subject B, each receives the payment corresponding to the initial endowment of 200 tokens.

If the subject A takes the 50 tokens from subject B, the payments of A and the drawn subject C and D depend, in addition to A’s choice, on the decisions taken by the drawn subject C and subject D. The payment of subject B depends only on the choice of subject A. The subjects C that are not drawn instead receive their allocation of 200 euros, regardless of the choices of the other subjects.

---

In particular, in each round, if subject A takes the tokens:

**The payments of subject A will be equal to**:

250 tokens if the final choice is not to sanction him/her.

250 – 100 tokens if the final choice is to sanction him/her by 100 tokens.

250 – 150 tokens if the final choice is to sanction him/her by 150 tokens.

**The payments of subject B will be equal to** 150 tokens

**The payments of the drawn subject C will be equal to**:

200 tokens if he/she decides not to sanction A and D confirms the choice.

200 – 20 tokens if he/she decides not to sanction A and D does not confirm the choice.

200 – 10 tokens if he/she decides to sanction A and D confirms the choice.

200 – 10 – 20 tokens if he/she decides to sanction A and D does not confirm the choice.

**The payments of subject D will be equal to**:

200 tokens if he/she confirms the choice of C.

200 – 10 tokens if he/she does not confirm the choice of C.

**The payments of the subjects C not drawn will be equal to** the endowment of 200 tokens.

The final payment is equal to the sum of the payments received in each round.

Each token is worth **0.02** euros.

---

We now give you a summary table
